# Supplementary material for: Targeted and Untargeted Metabolomics to Explore the Bioavailability of the Secoiridoids from a Seed/Fruit Extract (Fraxinus angustifolia Vahl) in Human Healthy Volunteers: A Preliminary Study
Source: PubMed Central journal article supplement (PMC6332458; doi:10.3390/molecules201219845), 2015-12-11
Supplement: molecules-20-19845-s001.pdf [file molecules-20-19845-s001.pdf]

# Targeted and Untargeted Metabolomics to Explore the Bioavailability of the Secoiridoids from a Seed/Fruit Extract (*Fraxinus angustifolia* Vahl) in Human Healthy Volunteers: A Preliminary Study

Rocío García-Villalba, Francisco A. Tomás-Barberán, Pascale Fañça-Berthon, Marc Roller, Pilar Zafrilla, Nicolas Issaly and Maria-Teresa García-Conesa

**Table S1.** Targeted metabolomics analysis: potential compounds specifically derived from the metabolic transformation of the secoiridoid glucosides identified in the *Fraxinus angustifolia* Vahl extract.

| Parent Compounds                                   |                                                   |            | Aglycone Fragments                                 |                                                   |            |
|----------------------------------------------------|---------------------------------------------------|------------|----------------------------------------------------|---------------------------------------------------|------------|
| Potential Metabolite                               | Molecular formula                                 | Exact Mass | Potential Metabolite                               | Molecular formula                                 | Exact Mass |
| Nuzhenide/ Excelside B/1-O-β-D-glucosylformoside * | C <sub>31</sub> H <sub>42</sub> O <sub>17</sub>   | 685.2349   | Tyrosol                                            | C <sub>8</sub> H <sub>10</sub> O <sub>2</sub>     | 137.0608   |
| + glucuronide                                      | C <sub>37</sub> H <sub>50</sub> O <sub>23</sub>   | 861.2670   | + glucuronide                                      | C <sub>14</sub> H <sub>18</sub> O <sub>8</sub>    | 313.0929   |
| + sulfate                                          | C <sub>31</sub> H <sub>42</sub> O <sub>20</sub> S | 765.1917   | + sulfate                                          | C <sub>8</sub> H <sub>10</sub> O <sub>5</sub> S   | 217.0176   |
| + sulfoglucuronide                                 | C <sub>37</sub> H <sub>50</sub> O <sub>26</sub> S | 941.2238   | + sulfoglucuronide                                 | C <sub>14</sub> H <sub>18</sub> O <sub>11</sub> S | 393.0497   |
| + methyl                                           | C <sub>38</sub> H <sub>52</sub> O <sub>26</sub> S | 955.2395   | + methyl                                           | C <sub>9</sub> H <sub>12</sub> O <sub>2</sub>     | 151.0765   |
| GL3/nuzhenide 11-methyl oleoside *                 | C <sub>48</sub> H <sub>64</sub> O <sub>27</sub>   | 1071.3562  | Hydroxytyrosol (Tyrosol+OH)                        | C <sub>8</sub> H <sub>10</sub> O <sub>3</sub>     | 153.0557   |
| + glucuronide                                      | C <sub>54</sub> H <sub>72</sub> O <sub>33</sub>   | 1247.3883  | + glucuronide                                      | C <sub>14</sub> H <sub>18</sub> O <sub>9</sub>    | 329.0878   |
| + sulfate                                          | C <sub>48</sub> H <sub>64</sub> O <sub>30</sub> S | 1151.3130  | + sulfate                                          | C <sub>8</sub> H <sub>10</sub> O <sub>6</sub> S   | 233.0125   |
| + sulfoglucuronide                                 | C <sub>54</sub> H <sub>72</sub> O <sub>36</sub> S | 1327.3451  | + sulfoglucuronide                                 | C <sub>14</sub> H <sub>18</sub> O <sub>12</sub> S | 409.0446   |
| + methyl                                           | C <sub>49</sub> H <sub>66</sub> O <sub>27</sub>   | 1085.3719  | + methyl                                           | C <sub>9</sub> H <sub>12</sub> O <sub>3</sub>     | 167.0714   |
| GL5                                                | C <sub>42</sub> H <sub>54</sub> O <sub>22</sub>   | 909.3034   | Ligstroside-aglycone                               | C <sub>19</sub> H <sub>22</sub> O <sub>7</sub>    | 361.1293   |
| + glucuronide                                      | C <sub>48</sub> H <sub>62</sub> O <sub>28</sub>   | 1085.3355  | + glucuronide                                      | C <sub>25</sub> H <sub>30</sub> O <sub>13</sub>   | 537.1614   |
| + sulfate                                          | C <sub>42</sub> H <sub>54</sub> O <sub>25</sub> S | 989.3602   | + sulfate                                          | C <sub>19</sub> H <sub>22</sub> O <sub>10</sub> S | 441.0861   |
| + sulfoglucuronide                                 | C <sub>48</sub> H <sub>62</sub> O <sub>31</sub> S | 1165.2923  | + sulfoglucuronide                                 | C <sub>25</sub> H <sub>30</sub> O <sub>16</sub> S | 617.1182   |
| + methyl                                           | C <sub>43</sub> H <sub>56</sub> O <sub>22</sub>   | 923.319    | + methyl                                           | C <sub>20</sub> H <sub>24</sub> O <sub>7</sub>    | 375.1449   |
| Salidroside (Tyrosol glucose)                      | C <sub>14</sub> H <sub>20</sub> O <sub>7</sub>    | 299.1136   | Oleuropein aglycone<br>(Ligstroside-aglycone + OH) | C <sub>19</sub> H <sub>22</sub> O <sub>8</sub>    | 377.1242   |
| + glucuronide                                      | C <sub>20</sub> H <sub>28</sub> O <sub>13</sub>   | 475.1457   | + glucuronide                                      | C <sub>25</sub> H <sub>30</sub> O <sub>14</sub>   | 553.1563   |
| + sulfate                                          | C <sub>14</sub> H <sub>20</sub> O <sub>10</sub> S | 379.0704   | + sulfate                                          | C <sub>19</sub> H <sub>22</sub> O <sub>11</sub> S | 457.0810   |
| + sulfoglucuronide                                 | C <sub>20</sub> H <sub>28</sub> O <sub>16</sub> S | 555.1025   | + sulfoglucuronide                                 | C <sub>25</sub> H <sub>30</sub> O <sub>17</sub> S | 633.1131   |
| + methyl                                           | C <sub>15</sub> H <sub>22</sub> O <sub>7</sub>    | 313.1293   | + methyl                                           | C <sub>20</sub> H <sub>24</sub> O <sub>8</sub>    | 391.1398   |
| Oleoside                                           | C <sub>16</sub> H <sub>22</sub> O <sub>11</sub>   | 389.1089   | Elenolic acid                                      | C <sub>11</sub> H <sub>14</sub> O <sub>6</sub>    | 241.0718   |
| + glucuronide                                      | C <sub>22</sub> H <sub>30</sub> O <sub>17</sub>   | 565.1410   | + glucuronide                                      | C <sub>17</sub> H <sub>22</sub> O <sub>12</sub>   | 417.1038   |
| + sulfate                                          | C <sub>16</sub> H <sub>22</sub> O <sub>14</sub> S | 469.0657   | + sulfate                                          | C <sub>11</sub> H <sub>14</sub> O <sub>9</sub> S  | 321.0286   |

Table S1. *Cont.*

| Parent Compounds                                    |                                                   |          | Aglycone Fragments        |                                                   |          |
|-----------------------------------------------------|---------------------------------------------------|----------|---------------------------|---------------------------------------------------|----------|
| + sulfoglucuronide                                  | C <sub>22</sub> H <sub>30</sub> O <sub>20</sub> S | 645.0978 | + sulfoglucuronide        | C <sub>17</sub> H <sub>22</sub> O <sub>15</sub> S | 497.0607 |
| + methyl                                            | C <sub>17</sub> H <sub>24</sub> O <sub>11</sub>   | 403.1246 | + methyl                  | C <sub>12</sub> H <sub>16</sub> O <sub>6</sub>    | 255.0874 |
| Elenolic acid glucose<br>(Oleoside-11 methyl ester) | C <sub>17</sub> H <sub>24</sub> O <sub>11</sub>   | 403.1246 | Demethyl-elenuolic acid   | C <sub>10</sub> H <sub>12</sub> O <sub>6</sub>    | 227.0561 |
| +glucuronide                                        | C <sub>23</sub> H <sub>32</sub> O <sub>17</sub>   | 579.1567 | + glucuronide             | C <sub>16</sub> H <sub>20</sub> O <sub>12</sub>   | 403.0882 |
| +sulfate                                            | C <sub>17</sub> H <sub>24</sub> O <sub>14</sub> S | 483.0814 | + sulfate                 | C <sub>10</sub> H <sub>12</sub> O <sub>9</sub> S  | 307.0129 |
| +sulfoglucuronide                                   | C <sub>23</sub> H <sub>32</sub> O <sub>20</sub> S | 659.1135 | + sulfoglucuronide        | C <sub>16</sub> H <sub>20</sub> O <sub>15</sub> S | 483.045  |
| + methyl                                            | C <sub>18</sub> H <sub>26</sub> O <sub>11</sub>   | 417.1402 |                           |                                                   |          |
| Ligstroside                                         | C <sub>25</sub> H <sub>32</sub> O <sub>12</sub>   | 523.1821 | Elenolic-Tyrosol-Elenolic | C <sub>30</sub> H <sub>34</sub> O <sub>12</sub>   | 585.1978 |
| + glucuronide                                       | C <sub>31</sub> H <sub>40</sub> O <sub>18</sub>   | 699.2142 | + glucuronide             | C <sub>36</sub> H <sub>42</sub> O <sub>18</sub>   | 761.2298 |
| + sulfate                                           | C <sub>25</sub> H <sub>32</sub> O <sub>15</sub> S | 603.2142 | + sulfate                 | C <sub>30</sub> H <sub>34</sub> O <sub>15</sub> S | 665.1546 |
| + sulfoglucuronide                                  | C <sub>31</sub> H <sub>40</sub> O <sub>21</sub> S | 779.1710 | + sulfoglucuronide        | C <sub>36</sub> H <sub>42</sub> O <sub>21</sub> S | 841.1867 |
| + methyl                                            | C <sub>26</sub> H <sub>34</sub> O <sub>12</sub>   | 537.1978 | + methyl                  | C <sub>31</sub> H <sub>36</sub> O <sub>12</sub>   | 599.2134 |

\*: isomers with the same molecular formulae.
